# Supplementary material for: Imbalance of Circulatory T Follicular Helper and T Follicular Regulatory Cells in Patients with ANCA-Associated Vasculitis
Source: Hindawi journal article supplement (doi:10.1155/2019/8421479), 2019-12-02
Supplement: f1 [file 8421479.f1.pdf]

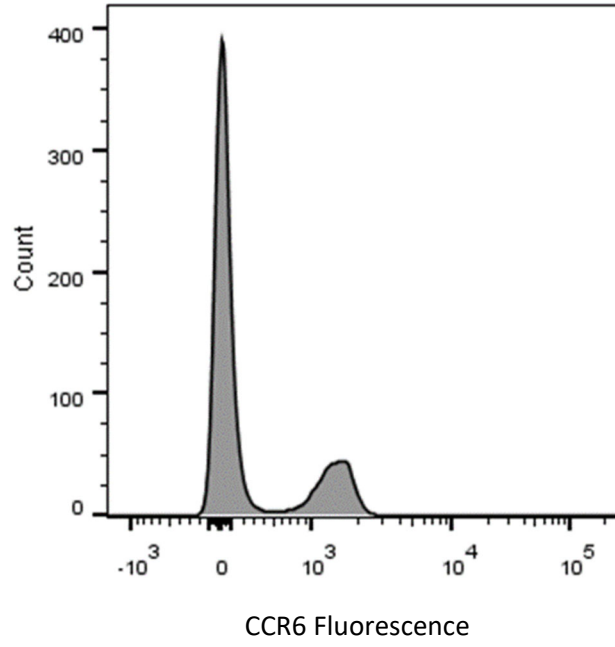

**Figure S1.** Positive controls for CCR6 staining.
